# Supplementary material for: Stretchable and transparent ionogel-based heaters
Source: Royal Society of Chemistry journal article supplement (doi:10.1039/d1mh01775f), 2022-01-01
Supplement: d1mh01775f1.pdf [file d1mh01775f1.pdf]

Electronic Supplementary Material (ESI) for Materials Horizons.  
This journal is © The Royal Society of Chemistry 2022

### **Electronic Supplementary Information**

#### **Stretchable and Transparent Ionogel-Based Heaters**

Limei Zhang, Kun Jia, Jiao Wang, Jiayou Zhao, Jingda Tang, and Jian Hu\*

State Key Laboratory for Strength and Vibration of Mechanical Structures,  
Department of Engineering Mechanics, Xi'an Jiaotong University, Xi'an 710049,  
China.

\*Corresponding author. E-mail: [hujian@mail.xjtu.edu.cn](mailto:hujian@mail.xjtu.edu.cn)

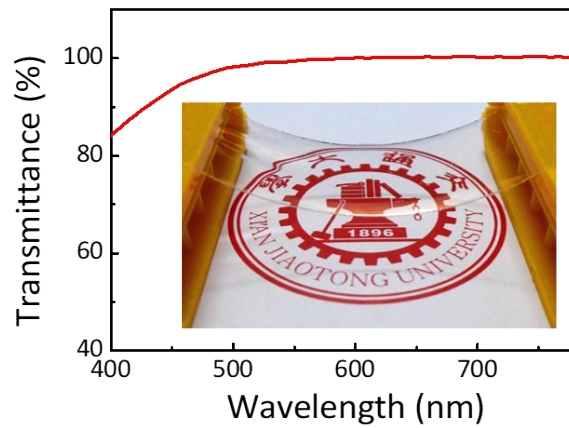

**Fig. S1** Transmittance of PHEA ionogels in the wavelength range from 400 nm to 780 nm. The thickness of the sample is 10 mm. The inset shows the appearance of the ionogel.

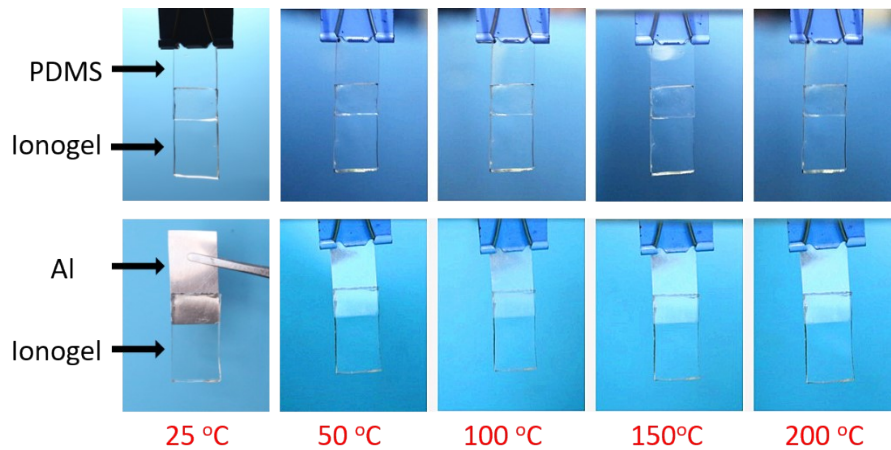

**Fig. S2** Effect of temperature on the adhesive performance of PHEA ionogels. PHEA ionogels ( $20 \times 10 \times 2 \text{ mm}^3$ ) self-adhered to the Al or PDMS substrate ( $20 \times 10 \text{ mm}^2$ ), with an overlapping area of  $7 \times 10 \text{ mm}^2$ .

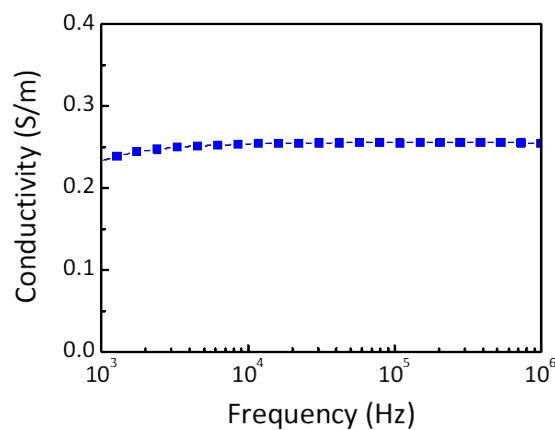

**Fig. S3** Ionic conductivity of PHEA ionogels in the frequency range of  $10^3$ - $10^6$  Hz.

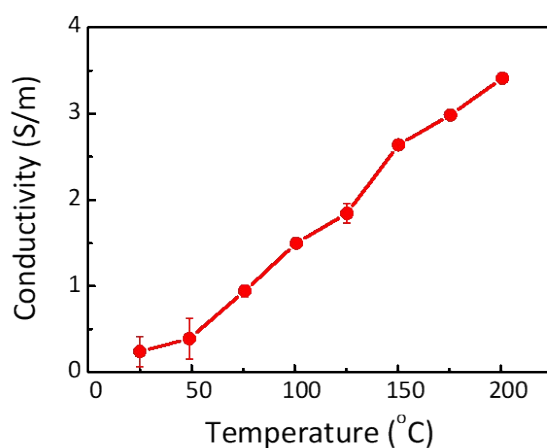

**Fig. S4** Conductivity of PHEA ionogels over a wide temperature range from 25 °C to 200 °C.

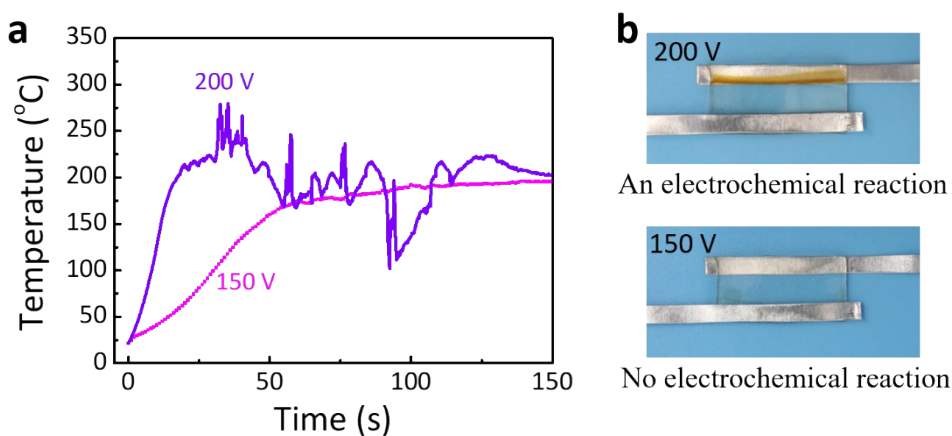

**Fig. S5** Voltage-dependent heating performance of PHEA ionogel-based THs. **(a)** Temperature of the TH varied with heating time at 200 V ( $>$  critical voltage 180 V) and 150 V ( $<$  180 V) with the frequency of  $10^4$  Hz. **(b)** Voltage-dependent electrochemical reaction on the electrodes. The color of the ionogel contacting with the electrodes changes from transparent to brown after electrochemical reaction.
